# Supplementary material for: Assessment of degenerative changes in the atlanto-odontoid joint using cone-beam computed tomography (CBCT) imaging
Source: PeerJ. 2025 Jun 10;13:e19569. doi: 10.7717/peerj.19569 (PMC12164810; doi:10.7717/peerj.19569)
Supplement: Supplemental Information 1 — This dataset contains retrospective data of female participants analyzed for degenerative changes in the atlanto-odontoid joint. The dataset includes participant age and osteoarthritis (OA) grading from two independent observations. [file peerj-13-19569-s001.xlsx]

## Sheet: Sayfa1
Sex	Age	OA Grade 1st Oberservation	OA Grade 2nd Oberservation
1	50	2	1
1	29	2	2
1	33	0	0
1	19	1	1
1	71	3	3
1	39	0	0
1	31	1	1
1	31	0	0
1	67	2	2
1	48	2	2
1	45	2	2
1	42	2	2
1	54	0	0
1	47	2	2
1	34	0	0
1	32	2	2
1	40	1	1
1	44	0	0
1	25	2	2
1	30	2	2
1	26	0	0
1	50	2	2
1	19	0	1
1	19	0	0
1	29	1	1
1	66	0	0
1	24	1	1
1	42	1	2
1	25	0	0
1	50	1	1
1	35	2	2
1	20	1	1
1	29	1	1
1	24	1	2
1	40	0	0
1	27	0	1
1	21	0	0
1	40	2	1
1	34	0	0
1	25	1	1
1	45	0	0
1	28	0	0
1	26	0	0
1	24	1	1
1	22	0	0
1	29	1	1
1	20	0	0
1	45	2	1
1	22	1	1
1	30	2	2
1	58	2	2
1	43	2	2
1	30	0	0
1	26	0	0
1	20	0	1
1	59	3	2
1	54	2	3
1	50	2	2
1	33	1	1
1	61	0	0
1	35	1	1
1	58	3	3
1	58	2	2
1	29	0	1
1	60	2	2
1	52	0	0
1	25	0	0
1	26	0	0
1	75	2	2
1	51	2	2
1	55	2	2
1	68	2	2
1	69	2	2
1	38	2	2
1	55	2	2
1	36	0	0
1	39	1	1
1	59	2	2
1	33	0	0
1	65	2	2
1	40	1	1
1	22	0	0
1	40	0	0
1	50	2	2
1	64	2	1
1	34	1	1
1	44	2	2
1	69	3	3
1	25	1	1
1	60	2	2
1	21	0	0
1	26	0	0
1	60	2	2
1	24	1	1
1	32	1	2
1	21	1	0
1	63	2	2
1	65	2	1
1	53	2	2
1	57	2	2
1	20	1	1
1	46	0	0
1	78	3	3
1	69	2	2
1	21	0	0
1	21	0	0
1	34	0	0
1	52	2	2
1	24	1	1
1	51	1	1
1	25	2	2
1	19	0	0
1	24	1	1
1	31	1	1
1	40	1	1
1	25	0	0
1	26	1	1
1	30	1	1
1	34	0	0
1	34	0	0
1	28	2	2
1	24	0	0
1	33	0	0
1	52	1	1
1	24	0	0
1	22	0	0
1	55	1	1
1	40	0	0
1	22	0	0
1	49	0	0
