# Supplementary material for: Assessment of degenerative changes in the atlanto-odontoid joint using cone-beam computed tomography (CBCT) imaging
Source: PeerJ. 2025 Jun 10;13:e19569. doi: 10.7717/peerj.19569 (PMC12164810; doi:10.7717/peerj.19569)
Supplement: Supplemental Information 2 — This dataset contains retrospective data of male participants analyzed for degenerative changes in the atlanto-odontoid joint. The dataset includes participant age and osteoarthritis (OA) grading from two independent observations. [file peerj-13-19569-s002.xlsx]

## Sheet: Sayfa1
Sex	Age	OA Grade 1st Oberservation	OA Grade 2nd Oberservation
2	59	2	2
2	55	2	2
2	47	2	2
2	19	0	0
2	25	2	2
2	22	2	2
2	70	3	3
2	35	2	2
2	79	3	3
2	22	0	0
2	53	2	2
2	42	1	1
2	68	0	0
2	26	0	0
2	43	2	2
2	57	2	2
2	46	2	2
2	24	0	0
2	48	2	2
2	50	2	2
2	70	2	2
2	19	0	0
2	28	2	2
2	31	1	1
2	20	1	1
2	51	2	2
2	21	0	0
2	18	0	0
2	32	2	2
2	22	0	0
2	46	2	2
2	31	1	1
2	39	2	2
2	56	3	3
2	53	0	0
2	48	2	2
2	44	2	2
2	57	2	2
2	22	2	2
2	29	2	2
2	44	1	1
2	20	0	0
2	18	0	0
2	61	2	2
2	75	3	3
2	52	2	2
2	28	1	1
2	18	0	0
2	67	3	3
2	57	2	2
2	29	0	0
2	34	1	1
2	36	2	2
2	63	2	2
2	55	2	1
2	53	2	2
2	38	1	1
2	42	1	2
2	21	0	0
2	63	2	2
2	44	0	0
2	18	0	0
2	34	2	2
2	20	0	0
2	19	1	1
2	19	0	0
2	25	0	0
2	27	1	1
2	63	2	2
2	23	2	2
2	39	2	2
2	43	2	2
2	20	0	0
2	47	2	2
2	46	2	2
2	42	0	0
2	23	0	0
2	19	2	2
2	31	1	1
2	20	0	0
2	51	2	2
2	38	1	1
2	25	0	0
2	24	0	0
2	28	0	0
